# Supplementary material
Source: PubMed Central journal article supplement (PMC8371568)
Supplement: jama-e2110413-s001.pdf [file jama-e2110413-s001.pdf]

## Supplemental Online Content

Johnston KJ, Hammond G, Meyers DJ, Joynt Maddox KE. Association of race and ethnicity and Medicare program type with ambulatory care access and quality measures. *JAMA*. Published August 17, 2021. doi:10.1001/jama.2021.10413

**eFigure.** Study Sample Selection Flowchart

**eTable 1.** Comparing Medicare Beneficiaries Included Versus Excluded From Study Sample, 2015-2018

**eTable 2.** Characteristics of Study Sample Beneficiaries by Race and Ethnicity, 2015-2018

**eTable 3.** Association of Black Versus White Race With Ambulatory Care Access and Quality in Medicare Advantage and Traditional Medicare, 2015-2018

**eTable 4.** Association of Medicare Advantage vs. Traditional Medicare With Ambulatory Care Access and Quality by Beneficiary Black and White Race, 2015-2018

**eTable 5.** Association of Medicare Advantage vs. Traditional Medicare With Differences in Access and Quality for Black vs. White Race Beneficiaries, 2015-2018

This supplemental material has been provided by the authors to give readers additional information about their work.

**eFigure. Study Sample Selection Flowchart**

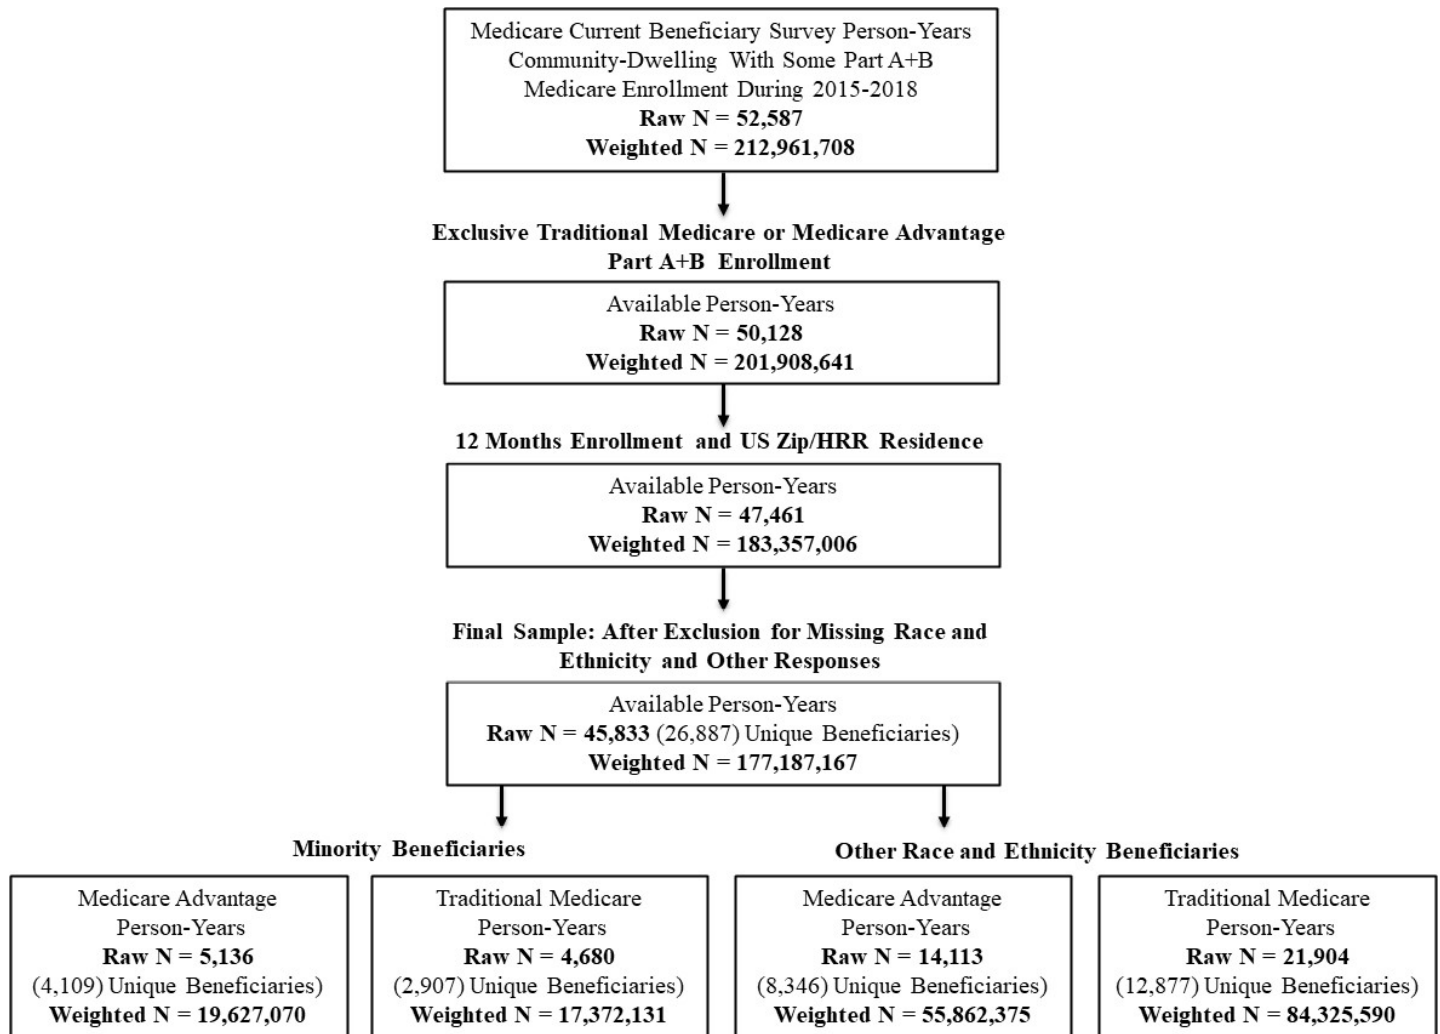

In the bottom boxes, some individuals appear in the data set in multiple years, and some are in traditional Medicare in one year and in Medicare Advantage the next year. Thus, these individuals appear in both Medicare program boxes in the unique beneficiaries count.

**eTable 1. Comparing Medicare Beneficiaries Included Versus Excluded From Study Sample, 2015-2018**

|                                                               | Study Sample Beneficiaries <sup>a</sup> | Excluded Beneficiaries <sup>b</sup> | P-Value <sup>c</sup> |
|---------------------------------------------------------------|-----------------------------------------|-------------------------------------|----------------------|
| <b>Total Number of Patient Years, Unweighted, N</b>           | <b>45,833</b>                           | <b>6,754</b>                        | --                   |
| <b>Total Number of Patient Years, Weighted, N<sup>d</sup></b> | <b>177,187,167</b>                      | <b>35,774,542</b>                   | --                   |
| <b>Demographic Characteristics</b>                            |                                         | <b>N =</b>                          |                      |
| Age in Years, <i>MEAN (SD)</i>                                | 71.3 (11.2)                             | 68.5 (10.5)                         | <.001                |
| Sex                                                           |                                         | 6,754                               |                      |
| Male                                                          | 44.6%                                   | 47.2%                               | 0.001                |
| Female                                                        | 55.4%                                   | 52.8%                               |                      |
| Race and Ethnicity                                            |                                         |                                     |                      |
| Minority                                                      | 20.9%                                   | 25.9%                               | <.001                |
| Other                                                         | 79.1%                                   | 74.1%                               |                      |
| Annual Income, <i>MEAN (SD)</i>                               | 52,691 (88,351)                         | 51,007 (62,252)                     | 0.252                |
| Education                                                     |                                         | 6,754                               |                      |
| No High School or College Education                           | 16.6%                                   | 19.0%                               | <.001                |
| High School / Some College Education                          | 57.8%                                   | 56.2%                               | 0.060                |
| College / Graduate School Education                           | 25.7%                                   | 24.8%                               | 0.311                |
| Lives Alone                                                   | 29.6%                                   | 5,675 25.3%                         | <.001                |
| Rural                                                         | 21.2%                                   | 6,309 19.4%                         | 0.036                |
| Urban                                                         | 78.8%                                   | 80.6%                               |                      |
| Medicare Advantage Market Penetration Rate                    | 33.1%                                   | 6,742 34.7%                         | <.001                |
| <b>Medicare Program</b>                                       |                                         |                                     |                      |
| Enrolled in Medicare Advantage                                | 42.6%                                   | 59.3%                               | <.001                |
| Enrolled in Traditional Medicare                              | 57.4%                                   | 40.7%                               |                      |
| Months Enrolled, <i>MEAN</i>                                  | 12.0                                    | 9.6                                 | <.001                |
| Current Medicare Entitlement Status                           |                                         | 6,754                               |                      |
| Aged                                                          | 85.5%                                   | 81.3%                               | <.001                |
| Disabled                                                      | 14.4%                                   | 18.5%                               | <.001                |
| End-Stage Renal Disease                                       | 0.8%                                    | 1.3%                                | 0.001                |
| Medicaid Dual Enrollment                                      | 17.8%                                   | 23.4%                               | <.001                |
| <b>Health Status</b>                                          |                                         |                                     |                      |
| Poor Self-Rated Health                                        | 22.9%                                   | 28.9%                               | <.001                |
| ADLs with Difficulty/Can't Do, (0-6), <i>MEAN (SD)</i>        | 0.68 (1.34)                             | 0.78 (1.16)                         | 0.007                |
| IADLs with Difficulty/Can't Do, (0-6), <i>MEAN (SD)</i>       | 0.83 (1.44)                             | 0.85 (1.18)                         |                      |
| Diabetes                                                      | 33.0%                                   | 34.0%                               | 0.354                |
| Heart Failure                                                 | 7.3%                                    | 7.3%                                | 0.908                |
| Ischemic Heart Disease                                        | 16.1%                                   | 15.9%                               | 0.823                |
| COPD/Asthma                                                   | 20.5%                                   | 22.0%                               | 0.068                |

|                  |       |       |       |       |
|------------------|-------|-------|-------|-------|
| Depression       | 26.7% |       | 30.0% | 0.001 |
| Died During Year | 0.3%  | 6,754 | 16.2% | <.001 |

#### **Ambulatory Care Access (Study N=41,757)**

|                             |       |       |       |       |
|-----------------------------|-------|-------|-------|-------|
| Usual Source of Care        | 92.0% |       | 87.4% | <.001 |
| Usual Source of Care is PCP | 81.7% | 3,510 | 75.9% | <.001 |
| Specialist Visit            | 54.1% |       | 48.4% | <.001 |

#### **Ambulatory Care Quality**

|                                                      |       |       |       |       |
|------------------------------------------------------|-------|-------|-------|-------|
| Influenza Vaccination (Study N=41,470)               | 71.7% | 4,618 | 63.2% | <.001 |
| Pneumonia Vaccination (Study N=38,829)               | 76.7% | 4,244 | 65.9% | <.001 |
| Colon Cancer Screening <sup>c</sup> (Study N=40,962) | 64.3% | 3,607 | 64.0% | 0.832 |

Abbreviations: N, number; ADLs, activities of daily living; IADLs, instrumental ADLs; COPD, chronic obstructive pulmonary disease; PCP, primary care clinician; MCBS, Medicare Current Beneficiary Survey.

<sup>a</sup>Medicare beneficiaries living in the community in a U.S. zip code and Hospital Referral Region with at least 1-calendar-year exclusive continuous enrollment in Medicare Advantage (MA) or Traditional Medicare (TM) benefits and completed the annual survey round in the MCBS.

<sup>b</sup>Medicare beneficiaries living in the community with at least 1-month enrollment in MA and/or TM benefits.

<sup>c</sup>P-value on the Wald Test of significance, equivalent to the F-statistic for continuous variables and the Chi-squared statistic for categorical variables.

<sup>d</sup>Weighted estimates from the 2015-18 MCBS using cross-sectional weights accounting for the overall annual selection probability of each person sampled and including adjustments for the stratified sampling design, survey nonresponse, and coverage error.

<sup>e</sup>Fecal occult blood test at home or doctor's office or colonoscopy or sigmoidoscopy within past 5 years, excluding patients who self-reported having colon cancer or were under age 45.

**eTable 2. Characteristics of Study Sample Beneficiaries by Race and Ethnicity, 2015-2018**

|                                                               | Minority           |                    |                    |                          | Other              |                    |
|---------------------------------------------------------------|--------------------|--------------------|--------------------|--------------------------|--------------------|--------------------|
|                                                               | Black              | Hispanic           | Native American    | Asian / Pacific Islander | White              | Multiracial        |
| <b>Total Number of Patient Years, Unweighted, N</b>           | <b>4,568</b>       | <b>4,049</b>       | <b>476</b>         | <b>723</b>               | <b>34,835</b>      | <b>1,182</b>       |
| <b>Total Number of Patient Years, Weighted, N<sup>a</sup></b> | <b>17,131,192</b>  | <b>14,124,098</b>  | <b>1,735,531</b>   | <b>4,008,380</b>         | <b>135,260,656</b> | <b>4,927,309</b>   |
| <b>Demographic Characteristics</b>                            |                    |                    |                    |                          |                    |                    |
| Age in Years, <i>MEAN (SD)</i>                                | 68.0 (13.4)        | 69.6 (12.6)        | 68.0 (12.0)        | 71.2 (9.0)               | 72.0 (10.7)        | 68.4 (11.4)        |
| Sex                                                           |                    |                    |                    |                          |                    |                    |
| Male                                                          | 41.0%              | 43.6%              | 49.6%              | 43.8%                    | 45.0%              | 47.5%              |
| Female                                                        | 59.0%              | 56.4%              | 50.4%              | 56.2%                    | 55.0%              | 52.5%              |
| Annual Income, <i>MEAN (SD)</i>                               | 29,355<br>(34,888) | 33,063<br>(55,053) | 27,520<br>(27,984) | 48,470<br>(56,464)       | 58,347 (96,706)    | 47,125<br>(49,592) |
| Education                                                     |                    |                    |                    |                          |                    |                    |
| No High School or College Education                           | 30.5%              | 46.9%              | 37.7%              | 20.2%                    | 11.3%              | 16.7%              |
| High School / Some College Education                          | 58.1%              | 41.1%              | 55.4%              | 39.6%                    | 59.8%              | 64.0%              |
| College / Graduate School Education                           | 11.4%              | 12.0%              | 6.9%               | 40.1%                    | 28.9%              | 19.2%              |
| Lives Alone                                                   | 34.7%              | 24.1%              | 24.0%              | 14.2%                    | 30.1%              | 28.1%              |
| Rural                                                         | 16.1%              | 6.7%               | 53.4%              | 3.1%                     | 23.4%              | 22.8%              |
| Urban                                                         | 83.9%              | 93.3%              | 46.6%              | 96.9%                    | 76.6%              | 77.2%              |
| Medicare Advantage Market Penetration Rate                    | 32.7%              | 39.9%              | 26.4%              | 37.0%                    | 32.4%              | 32.4%              |
| <b>Medicare Program</b>                                       |                    |                    |                    |                          |                    |                    |
| Medicare Advantage                                            | 51.1%              | 60.1%              | 35.4%              | 44.0%                    | 39.8%              | 42.0%              |
| Traditional Medicare                                          | 48.9%              | 39.9%              | 64.6%              | 56.0%                    | 60.2%              | 58.0%              |
| Current Medicare Entitlement Status                           |                    |                    |                    |                          |                    |                    |
| Aged                                                          | 73.4%              | 81.0%              | 78.5%              | 89.5%                    | 87.8%              | 78.6%              |
| Disabled                                                      | 26.5%              | 18.6%              | 21.5%              | 10.3%                    | 12.1%              | 21.3%              |
| End-Stage Renal Disease                                       | 2.5%               | 1.8%               | 1.8%               | 1.2%                     | 0.4%               | 0.4%               |
| Medicaid Dual Enrollment                                      | 38.4%              | 43.0%              | 35.8%              | 31.1%                    | 11.8%              | 22.4%              |

### Health Status

|                                                         |             |             |             |             |             |             |
|---------------------------------------------------------|-------------|-------------|-------------|-------------|-------------|-------------|
| Poor Self-Rated Health                                  | 33.8%       | 37.4%       | 37.0%       | 23.2%       | 19.5%       | 30.4%       |
| ADLs with Difficulty/Can't Do, (0-6), <i>MEAN (SD)</i>  | 0.92 (1.55) | 0.93 (1.66) | 1.01 (1.60) | 0.61 (1.11) | 0.62 (1.26) | 1.00 (1.55) |
| IADLs with Difficulty/Can't Do, (0-6), <i>MEAN (SD)</i> | 1.10 (1.64) | 1.16 (1.78) | 1.16 (1.69) | 0.98 (1.37) | 0.74 (1.36) | 1.11 (1.63) |
| Diabetes                                                | 43.5%       | 45.5%       | 41.9%       | 43.5%       | 29.6%       | 39.8%       |
| Heart Failure                                           | 11.2%       | 6.3%        | 9.0%        | 2.5%        | 6.9%        | 9.3%        |
| Ischemic Heart Disease                                  | 14.2%       | 16.1%       | 17.1%       | 11.4%       | 16.3%       | 20.5%       |
| COPD/Asthma                                             | 18.8%       | 18.7%       | 26.2%       | 12.3%       | 20.8%       | 29.7%       |
| Depression                                              | 23.9%       | 34.0%       | 33.5%       | 16.9%       | 26.2%       | 33.0%       |

### Access

|                                |       |       |       |       |       |       |
|--------------------------------|-------|-------|-------|-------|-------|-------|
| Usual Source of Care, %        | 88.9% | 90.1% | 90.3% | 91.2% | 92.7% | 89.1% |
| Usual Source of Care is PCP, % | 73.0% | 78.7% | 78.5% | 79.0% | 83.5% | 76.5% |
| Specialist Visit, %            | 38.8% | 43.1% | 44.9% | 39.9% | 58.0% | 47.1% |

### Quality

|                                     |       |       |       |       |       |       |
|-------------------------------------|-------|-------|-------|-------|-------|-------|
| Influenza Vaccination               | 59.8% | 71.4% | 66.1% | 75.0% | 74.8% | 66.6% |
| Pneumonia Vaccination               | 64.7% | 68.9% | 73.8% | 68.4% | 78.6% | 74.6% |
| Colon Cancer Screening <sup>b</sup> | 65.6% | 67.2% | 62.5% | 61.6% | 63.9% | 65.4% |

Abbreviations: N, number; PCP, primary care clinicians; ADLs, activities of daily living; IADLs, instrumental ADLs; COPD, chronic obstructive pulmonary disease; MCBS, Medicare Current Beneficiary Survey; Asian/Pacific Islander includes Hawaiian.

<sup>a</sup>Weighted estimates from the 2015-18 MCBS using cross-sectional weights accounting for the overall annual selection probability of each person sampled and including adjustments for the stratified sampling design, survey nonresponse, and coverage error.

<sup>b</sup>Fecal occult blood test at home or doctor's office or colonoscopy or sigmoidoscopy within past 5 years, excluding patients who self-reported having colon cancer or were under age 45.

**eTable 3. Association of Black Versus White Race With Ambulatory Care Access and Quality in Medicare Advantage and Traditional Medicare, 2015-2018**

|                                        | Sample Size <sup>a</sup> N= | Unadjusted Results |       |                              | Adjusted Regression Results <sup>b</sup>        |
|----------------------------------------|-----------------------------|--------------------|-------|------------------------------|-------------------------------------------------|
|                                        |                             | Black              | White | Absolute Difference (95% CI) | Marginal Difference of Black vs. White (95% CI) |
| <b>Access in Medicare Advantage</b>    |                             |                    |       |                              |                                                 |
| Usual Source of Care, % <sup>c</sup>   | 14,439                      | 90.4               | 94.2  | -3.8 (-6.1, -1.5)            | -2.6 (-4.5, -0.6)                               |
| Usual Source of Care is PCP, %         | 14,439                      | 75.7               | 86.0  | -10.3 (-13.9, -6.8)          | -5.4 (-7.4, -3.4)                               |
| Specialist Visit, %                    | 14,439                      | 39.0               | 57.9  | -18.9 (-22.5, -15.2)         | -15.3 (-18.9, -11.6)                            |
| <b>Quality in Medicare Advantage</b>   |                             |                    |       |                              |                                                 |
| Influenza Vaccination <sup>c</sup>     | 14,452                      | 62.0               | 75.1  | -13.1 (-16.8, -9.5)          | -8.3 (-12.4, -4.3)                              |
| Pneumonia Vaccination <sup>c</sup>     | 13,579                      | 69.2               | 80.5  | -11.3 (-15.2, -7.5)          | -5.9 (-9.9, -1.9)                               |
| Colon Cancer Screening <sup>c,d</sup>  | 14,691                      | 68.3               | 67.1  | 1.2 (-2.2, 4.6)              | 4.6 (1.2, 8.1)                                  |
| <b>Access in Traditional Medicare</b>  |                             |                    |       |                              |                                                 |
| Usual Source of Care, %                | 21,523                      | 87.3               | 91.8  | -4.4 (-6.7, -2.2)            | -0.7 (-1.8, 0.5)                                |
| Usual Source of Care is PCP, %         | 21,523                      | 70.1               | 81.8  | -11.7 (-15.9, -7.5)          | -6.4 (-8.9, -3.9)                               |
| Specialist Visit, %                    | 21,523                      | 38.6               | 58.1  | -19.5 (-23.3, -15.7)         | -13.4 (-16.8, -10.0)                            |
| <b>Quality in Traditional Medicare</b> |                             |                    |       |                              |                                                 |
| Annual Flu Shot                        | 21,281                      | 56.4               | 72.7  | -16.3 (-20.7, -11.9)         | -9.0 (-12.9, -5.1)                              |
| Influenza Vaccination                  | 19,982                      | 61.5               | 78.1  | -16.6 (-20.2, -13.0)         | -7.4 (-10.8, -4.0)                              |
| Colon Cancer Screening <sup>c,d</sup>  | 20,672                      | 62.6               | 61.8  | 0.8 (-2.7, 4.3)              | 5.3 (2.2, 8.5)                                  |

Abbreviations: N, number; CI, confidence interval; PCP, primary care clinician.

<sup>a</sup>Met baseline study inclusion and exclusion criteria in Table 1 and responded to MCBS questions for outcome variables. Reporting unweighted sample sizes.

<sup>b</sup>We estimated multivariable logistic regression models for each outcome that also adjusted for the characteristics listed in Table 1. We added fixed effects for the Dartmouth Hospital Referral Regions that beneficiaries resided in to control for market-level differences in supply of medical services, clinician practice intensity, and coding intensity. We included year fixed effects to control for secular trend and adjusted our p-values for the complex survey design of the MCBS and intra-person correlation over time. We used Stata's Margins command to report marginal differences as the change in the mean probability of the outcome variable associated with Black vs. White race.

<sup>c</sup>We estimated a linear probability model because the logistic regression model would not converge.

<sup>d</sup>Fecal occult blood test at home or doctor's office or colonoscopy or sigmoidoscopy within past 5 years, excluding patients who self-reported having colon cancer or are under age 45.

**eTable 4. Association of Medicare Advantage vs. Traditional Medicare With Ambulatory Care Access and Quality by Beneficiary Black and White Race, 2015-2018**

|                                       | Sample Size <sup>a</sup> N= | Unadjusted Results |                      |                              | Adjusted Regression Results <sup>b</sup>                                    |
|---------------------------------------|-----------------------------|--------------------|----------------------|------------------------------|-----------------------------------------------------------------------------|
|                                       |                             | Medicare Advantage | Traditional Medicare | Absolute Difference (95% CI) | Marginal Difference of Medicare Advantage vs. Traditional Medicare (95% CI) |
| <b>Access in Black Beneficiaries</b>  |                             |                    |                      |                              |                                                                             |
| Usual Source of Care, %               | 4,172                       | 90.4               | 87.3                 | 3.1 (0.1, 6.0)               | 0.4 (-0.5, 1.3)                                                             |
| Usual Source of Care is PCP, %        | 4,172                       | 75.7               | 70.1                 | 5.6 (0.9, 10.2)              | 3.8 (-0.5, 8.0)                                                             |
| Specialist Visit, %                   | 4,172                       | 39.0               | 38.6                 | 0.4 (-3.9, 4.6)              | -0.8 (-5.0, 3.5)                                                            |
| <b>Quality in Black Beneficiaries</b> |                             |                    |                      |                              |                                                                             |
| Influenza Vaccination                 | 4,123                       | 62.0               | 56.4                 | 5.5 (0.7, 10.4)              | 5.1 (0.5, 9.8)                                                              |
| Pneumonia Vaccination <sup>c</sup>    | 3,737                       | 69.2               | 61.5                 | 7.7 (3.2, 12.3)              | 5.3 (1.2, 9.5)                                                              |
| Colon Cancer Screening <sup>c,d</sup> | 3,620                       | 68.3               | 62.6                 | 5.7 (1.8, 9.5)               | 3.9 (-0.3, 8.0)                                                             |
| <b>Access in White Beneficiaries</b>  |                             |                    |                      |                              |                                                                             |
| Usual Source of Care, %               | 31,790                      | 94.2               | 91.8                 | 2.4 (1.4, 3.5)               | 1.4 (0.8, 2.0)                                                              |
| Usual Source of Care is PCP, %        | 31,790                      | 86.0               | 81.8                 | 4.2 (2.3, 6.1)               | 1.4 (0.8, 2.0)                                                              |
| Specialist Visit, %                   | 31,790                      | 57.9               | 58.1                 | -0.3 (-2.4, 1.9)             | -0.5 (-2.2, 1.3)                                                            |
| <b>Quality in White Beneficiaries</b> |                             |                    |                      |                              |                                                                             |
| Influenza Vaccination                 | 31,610                      | 75.1               | 72.7                 | 2.4 (0.8, 4.0)               | 2.1 (0.8, 3.5)                                                              |
| Pneumonia Vaccination                 | 29,824                      | 80.5               | 78.1                 | 2.4 (0.9, 4.0)               | 1.6 (0.1, 3.0)                                                              |
| Colon Cancer Screening <sup>c,d</sup> | 31,743                      | 67.1               | 61.8                 | 5.3 (3.6, 7.0)               | 4.4 (3.1, 5.8)                                                              |

Abbreviations: N, number; CI, confidence interval; PCP, primary care clinician.

<sup>a</sup>Met baseline study inclusion and exclusion criteria in Table 1 and responded to MCBS questions for outcome variables. Reporting unweighted sample sizes. <sup>b</sup>We estimated multivariable logistic regression models for each outcome that also adjusted for the characteristics listed in Table 1. We added fixed effects for the Dartmouth Hospital Referral Regions that beneficiaries resided in to control for market-level differences in supply of medical services, clinician practice intensity, and coding intensity. We included year fixed effects to control for secular trend and adjusted our p-values for the complex survey design of the MCBS and intra-person correlation over time. We used Stata's Margins command to report marginal differences as the change in the mean probability of the outcome variable associated with Medicare Advantage vs. Traditional Medicare enrollment.

<sup>c</sup>We estimated a linear probability model because the logistic regression model would not converge.

<sup>d</sup>Fecal occult blood test at home or doctor's office or colonoscopy or sigmoidoscopy within past 5 years, excluding patients who self-reported having colon cancer or are under age 45.



**eTable 5. Association of Medicare Advantage vs. Traditional Medicare With Differences in Access and Quality for Black vs. White Race Beneficiaries, 2015-2018**

|                                             |                                   |                              | <b>Adjusted Regression Results for Interaction</b>                              |
|---------------------------------------------|-----------------------------------|------------------------------|---------------------------------------------------------------------------------|
|                                             | <b>Sample Size<sup>a</sup> N=</b> | <b>Outcome Variable Mean</b> | <b>Marginal Difference of Medicare Advantage AND Black<sup>b</sup> (95% CI)</b> |
| <b>Association with Access Differences</b>  |                                   |                              |                                                                                 |
| Usual Source of Care, %                     | 35,962                            | 92.3                         | -0.7 (-2.5, 1.1)                                                                |
| Usual Source of Care is PCP, %              | 35,962                            | 82.3                         | -0.3 (-3.9, 3.4)                                                                |
| Specialist Visit, %                         | 35,962                            | 55.8                         | -1.2 (-6.0, 3.6)                                                                |
| <b>Association with Quality Differences</b> |                                   |                              |                                                                                 |
| Influenza Vaccination                       | 35,733                            | 72.1                         | 1.0 (-3.2, 5.2)                                                                 |
| Pneumonia Vaccination                       | 33,561                            | 77.6                         | 1.3 (-2.2, 4.9)                                                                 |
| Colon Cancer Screening <sup>d</sup>         | 35,363                            | 64.1                         | 0.1 (-4.0, 4.1)                                                                 |

Abbreviations: N, number; CI, confidence interval; PCP, primary care clinician.

<sup>a</sup>Met baseline study inclusion and exclusion criteria in Table 1 and responded to MCBS questions for outcome variables. Reporting unweighted sample sizes.

<sup>b</sup>We estimated multivariable logistic regression models for each outcome that also adjusted for the characteristics listed in Table 1. We added fixed effects for the Dartmouth Hospital Referral Regions that beneficiaries resided in to control for market-level differences in supply of medical services, clinician practice intensity, and coding intensity. We included year fixed effects to control for secular trend and adjusted our p-values for the complex survey design of the MCBS and intra-person correlation over time. We used Stata's Margins command to report marginal differences as the change in the mean probability of the outcome variable associated with the interaction of Medicare Advantage and Black vs. Traditional Medicare and White race. We estimated the percentage difference as the marginal difference divided by the outcome variable sample mean.

<sup>d</sup>Fecal occult blood test at home or doctor's office or colonoscopy or sigmoidoscopy within past 5 years, excluding patients who self-reported having colon cancer or are under age 45. We estimated a linear probability model for colon cancer screening because the logistic regression model would not converge.
